# Supplementary material for: Mechanical breathing in organic electrochromics
Source: PubMed Central journal article supplement (PMC6954196; doi:10.1038/s41467-019-14047-8), 2020-01-10
Supplement: 41467_2019_14047_MOESM3_ESM.pdf [file 41467_2019_14047_MOESM3_ESM.pdf]

## **Description of Additional Supplementary Files**

File Name: Supplementary Movie 1

Description: Mechanical breathing of the PProDOT thin film on ITO electrode
